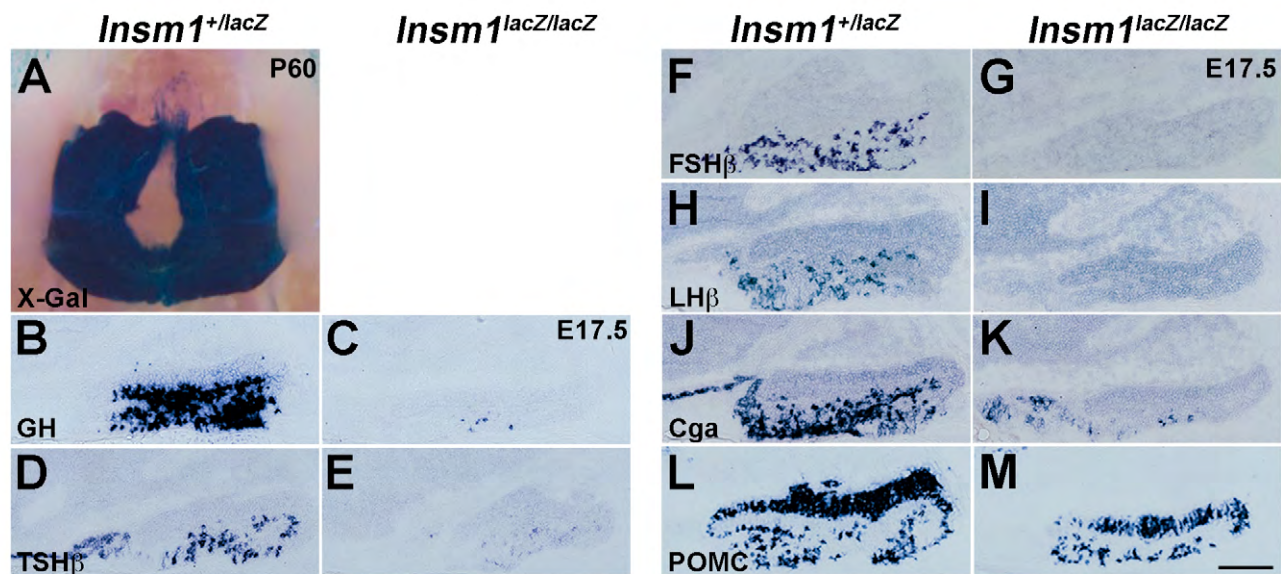

**Fig. S1. *Insm1* expression in the adult pituitary gland and reduced transcription of genes encoding pituitary hormones.** Whole mount X-Gal staining of a P60 *Insm1*<sup>+/*lacZ*</sup> pituitary gland demonstrates transcriptional activity of the *Insm1* locus in the adult (A). Transcript levels of hormone coding genes were assessed by *in situ* hybridization in control and mutant (*Insm1*<sup>*lacZ*/*lacZ*</sup>) mice at E17.5 (B-M). GH (B,C), TSH $\beta$  (D,E), FSH $\beta$  (F,G) and LH $\beta$  (H,I) transcripts were abundant in control pituitaries and absent in pituitaries of *Insm1*<sup>*lacZ*/*lacZ*</sup> mice, and Cga (J,K) and POMC (L,M) transcripts were present at reduced levels in mutants. Scale bar: 100  $\mu$ m.

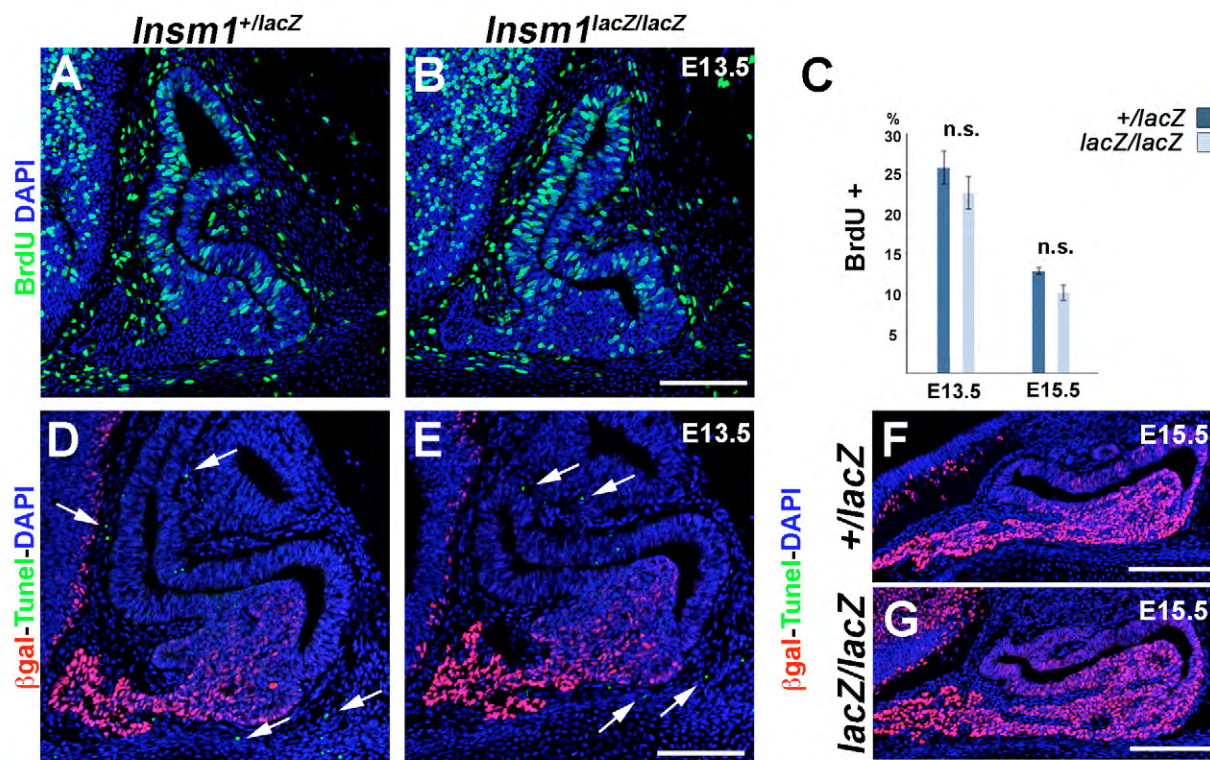

**Fig. S2. The *Insm1* mutation does not promote proliferation or cell death.** Proliferation was assessed at E13.5 and E15.5 by BrdU incorporation (A-C) in control (*Insm1*<sup>+/*lacZ*</sup>) and mutant (*Insm1*<sup>*lacZ*/*lacZ*</sup>) mice. Nuclei were counterstained with DAPI, and the percentage of BrdU+ cells was determined (C). Apoptosis was assessed by Terminal deoxynucleotidyl transferase dUTP nick end labeling (TUNEL) assay at E13.5 (D,E) and E15.5 (F,G). In control and mutant mice at E13.5 or E15.5, a few apoptotic cells (arrows) were observed in parenchymal and other tissues adjacent to the pituitary gland, but not within the gland (D-G). Scale bars: 100  $\mu$ m.



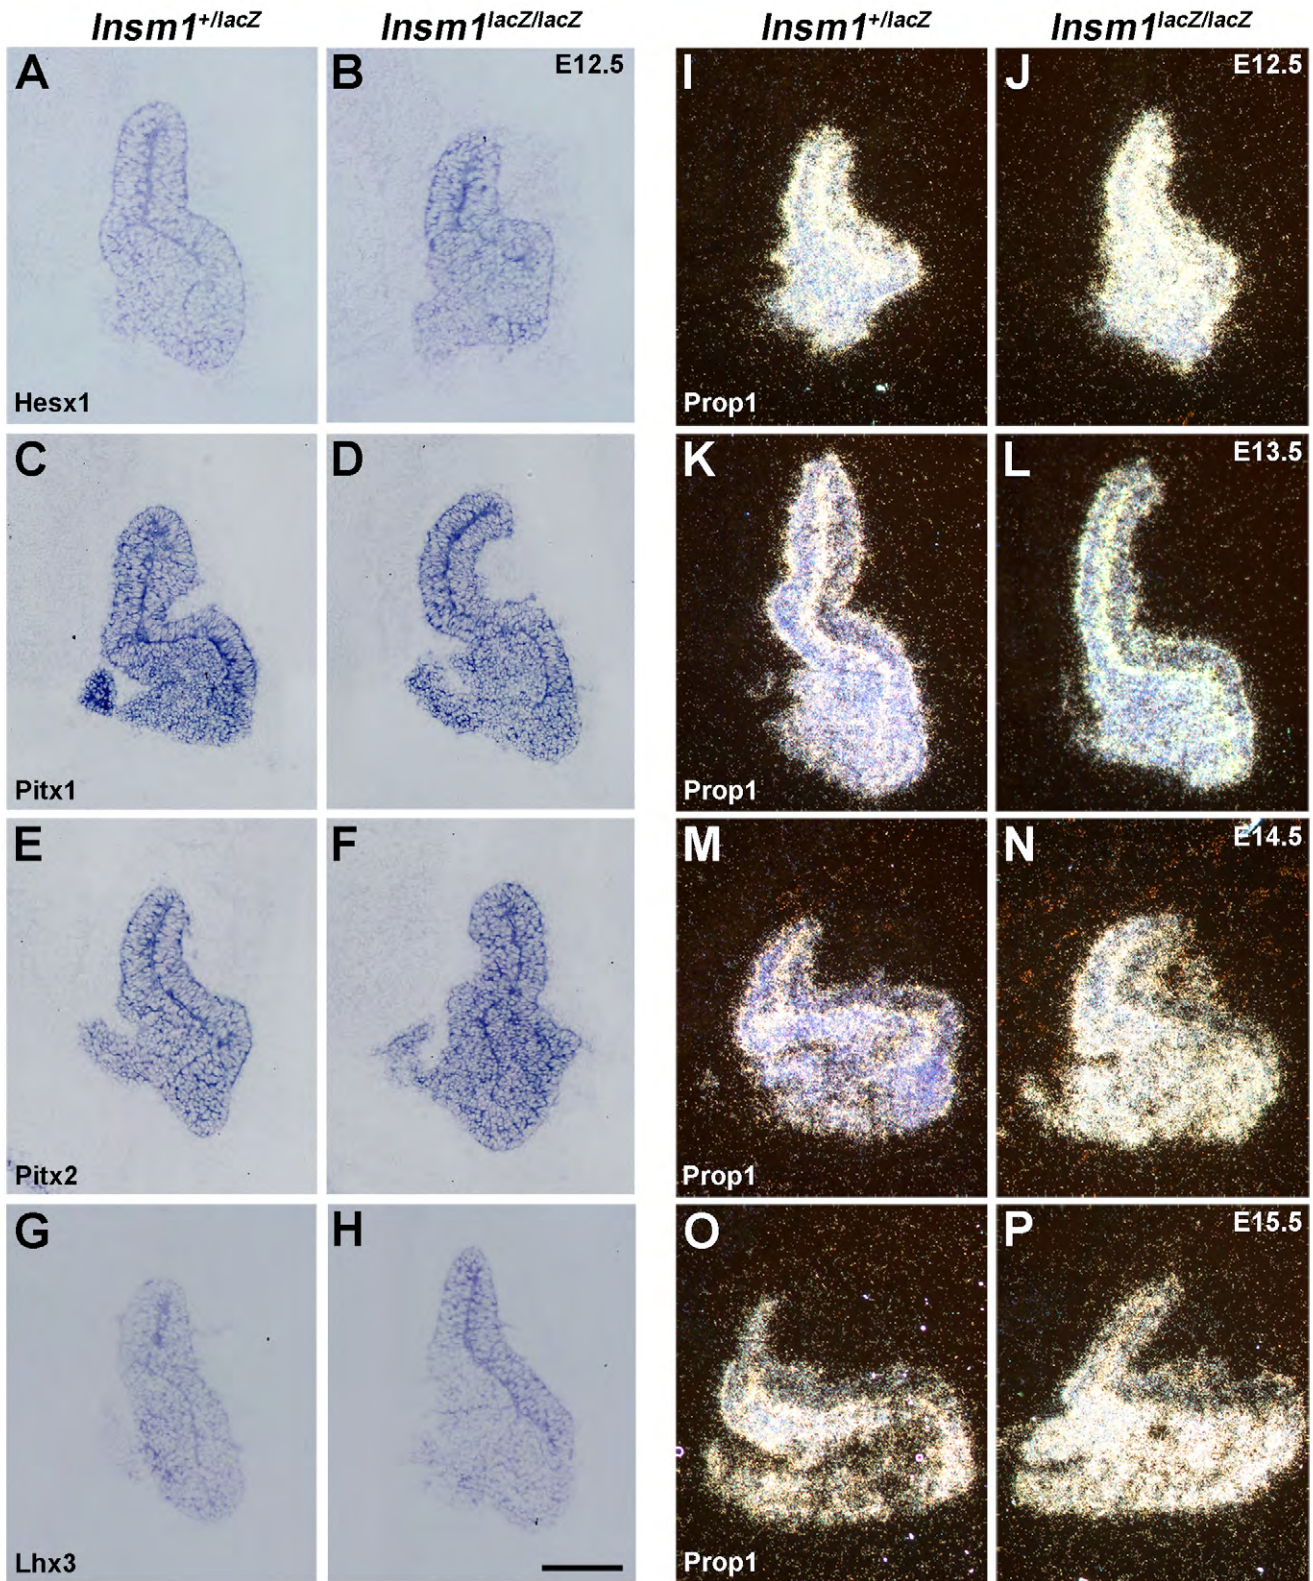

**Fig. S3. Pituitary endocrine cells are specified correctly in *Insm1* mutant mice.** The expression of transcription factors expressed during specification of pituitary endocrine cells was assessed by *in situ* hybridization. The transcripts of *Hesx1* (A,B), *Pitx1* (C,D), *Pitx2* (E,F), *Lhx3* (G,H), and *Prop1* (I-P) were detected at comparable levels in control (*Insm1*<sup>+/lacZ</sup>) and mutant (*Insm1*<sup>lacZ/lacZ</sup>) mice at E12 or E13.5. At E14.5 and E15.5, expression of *Prop1* was mildly enhanced in the anterior lobe. Scale bar: 100  $\mu$ m.

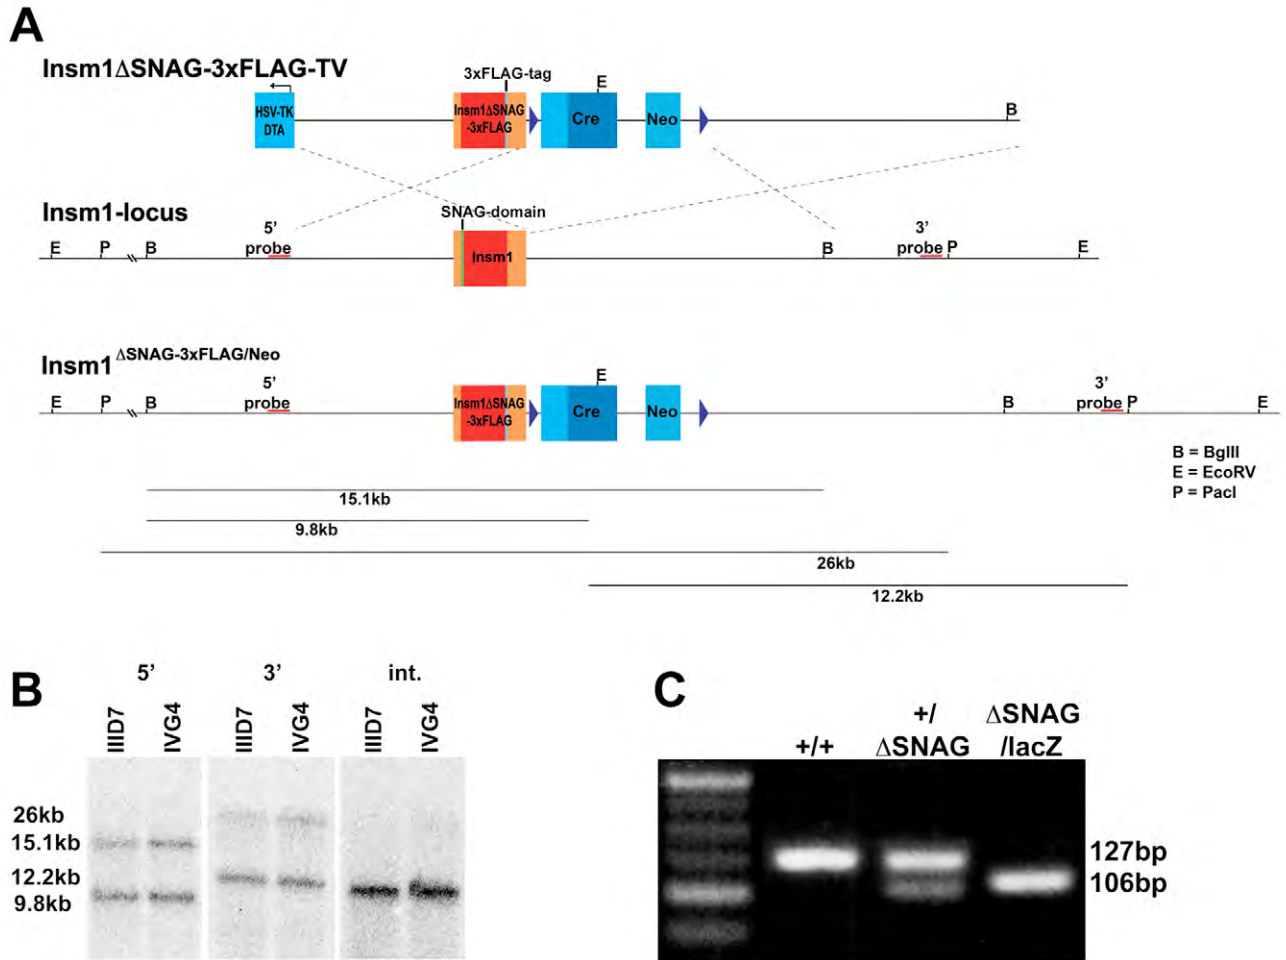

**Fig. S4. Generation of *Insm1* <sup>$\Delta$ SNAG</sup> mutant mice.** Schematic representation of the targeting vector, the wild-type *Insm1* locus, and the mutated *Insm1* <sup>$\Delta$ SNAG</sup> allele (A). Coding (red) and non-coding (orange) sequences, the SNAG domain (green), the N-terminal 3xFLAG-tag (grey), DTA, the self-excision neomycin cassette, loxP (arrowhead), Southern blot probes (red bars) and *Bg*III, EcoRV and PacI restriction sites are depicted. Black lines indicate the predicted fragment sizes obtained after digestion of genomic DNA. G418 resistant clones were analyzed by Southern blotting (B). Hybridization with a probe located 5' of the targeting vector detected 15.1 kb and 9.8 kb DNA fragments corresponding to *Insm1* wildtype and *Insm1* <sup>$\Delta$ SNAG</sup> alleles, respectively; the DNA from ES cells was digested with *Bg*III/EcoRV. Hybridization with a probe located 3' of the targeting vector detected 26 kb and 12.2 kb fragments of *Insm1* wildtype and *Insm1* <sup>$\Delta$ SNAG</sup> alleles; the DNA was digested by PacI/EcoRV. A probe containing sequences present in the targeting vector was used to ensure the absence of random integration events. (C) *Insm1* wildtype and *Insm1* <sup>$\Delta$ SNAG</sup> alleles are distinguishable by PCR. PCR amplification of *Insm1* wildtype and *Insm1* <sup>$\Delta$ SNAG</sup> alleles produce a 127 bp and 106 bp fragment, respectively.



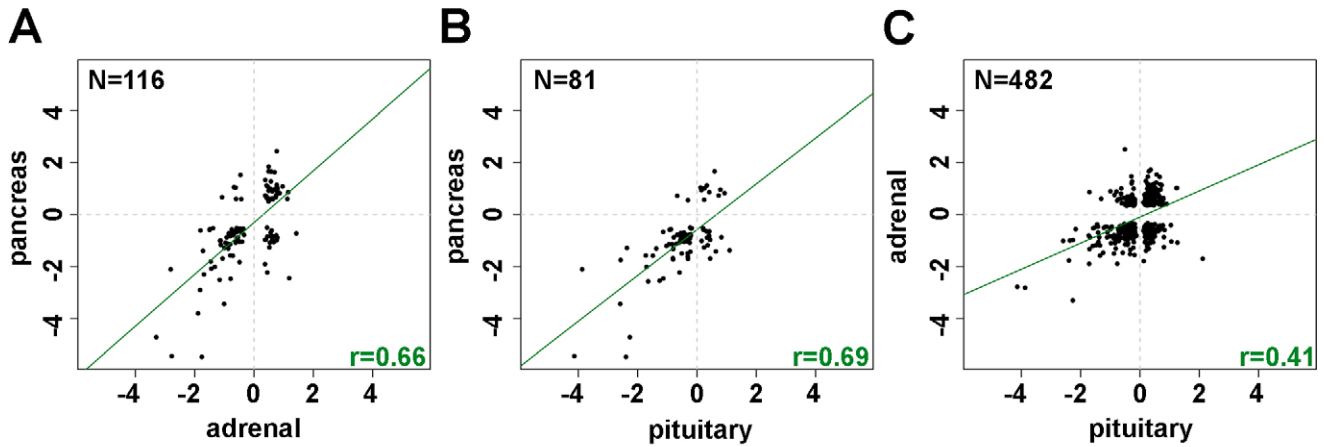

**Fig. S5. Comparison of gene expression changes in three different endocrine cell types of *Insm1* mutant mice.** Cross comparison of expression changes (log<sub>2</sub> values are given) in three different (adrenergic, pancreatic and pituitary) endocrine organs of *Insm1* mutant versus control mice. Green: linear regression line and Pearson's correlation coefficients. Each scatter plot represents genes that are deregulated in both organs (FC more than 1.7). (A) Comparison of deregulated genes in the adrenal gland and pancreas (116 genes); (B) Comparison of deregulated genes in the pituitary and pancreas (81 genes); (C) Comparison of deregulated genes in the pituitary and adrenal gland (482 genes).

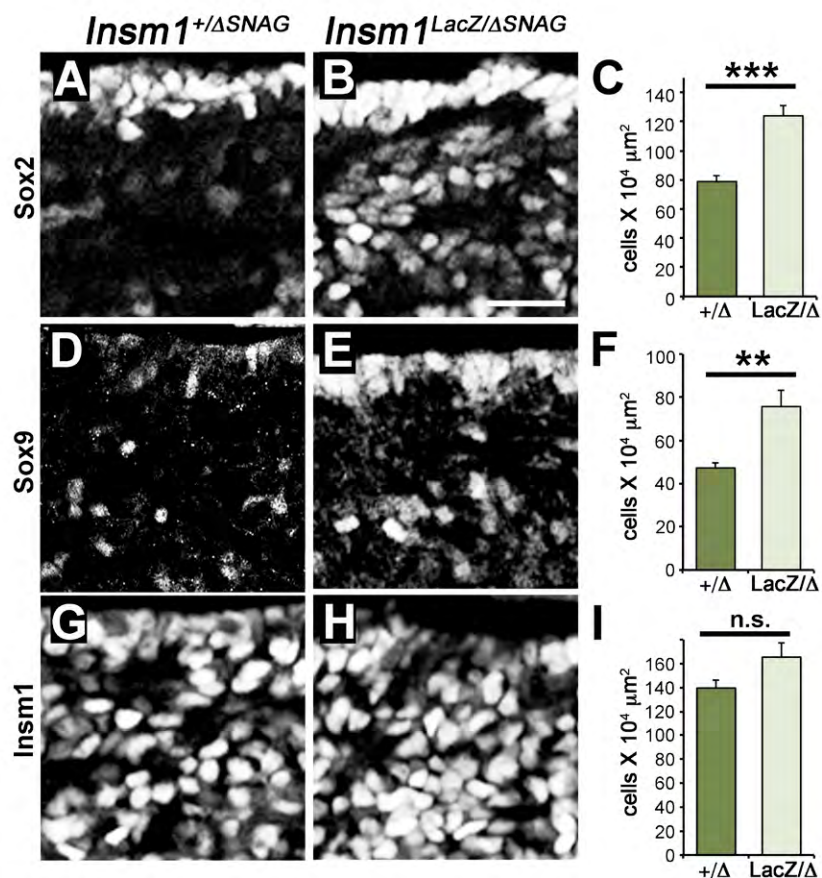

**Fig. S6. Mutation of *Insm1* results in an increased number of cells that retain progenitor characteristics.** Immunohistochemical analysis of endocrine progenitor cells using antibodies directed against Sox2 (A,B), Sox9 (D,E) and Insm1 (G,H) in the pituitary of *Insm1* control (*Insm1*<sup>+/ $\Delta$ SNAG</sup>) and mutant (*Insm1*<sup>LacZ/ $\Delta$ SNAG</sup>) mice at E17.5. Quantification of numbers of Sox2+ (C), Sox9+ (F) and Insm1+ cells (I) in the anterior lobe of the pituitary; whereas the numbers of Sox2+ and Sox9+ cells were increased, the number of Insm1+ cells was not significantly changed. Scale bars: 25  $\mu$ m. \*\**P*<0.01

**Table S1. Primers used for qRT-PCR**

| <b>Name</b> | <b>Primer Sequence 5' to 3'</b> |
|-------------|---------------------------------|
| Myl1-fw     | CACATCATGTCTGTCTAAACGG          |
| Myl1-rv     | CTGGTGTGACAGTTAGCCAT            |
| Actc1-fw    | AGGCCCATCCATTGTCCA              |
| Actc1-rv    | CAAGAAGCACAATACGGTCA            |
| Msc-fw      | GCTTTGTGGAACCTCCGCTT            |
| Msc-rv      | AGGGCAAACCACACTTGTCT            |
| Chga-fw     | ACACTTCTGCAGGGCAGC              |
| Chga-rv     | AGTTATTGCAGTTGTGCCCC            |
| Chgb-fw     | ATTCACCCACAGGCAGAAAG            |
| Chgb-rv     | ACAAGTCACGCTAGTCACATGG          |
| Pcsk1-fw    | CCATGCTGCGACTCCT                |
| Pcsk1-rv    | TGATTGTTTTGAAAGTGCATT           |
| Pcsk2-fw    | ACCTTTGGCATCAGTATTAACACC        |
| Pcsk2-rv    | CATCAGACTCAGGGGCATCA            |
| Scg3-fw     | TGTCTCGGCATGCTAGACAC            |
| Scg3-rv     | GACGTGGGTTTATTTCCGTG            |
| Notch2-fw   | GCTATAAGTGCCCTGCGAT             |
| Notch2-rv   | AGGCACACTCATCTATATTCACC         |
| Dll1-fw     | GATACACACAGCAAACGTGACACC        |
| Dll1-rv     | TTCCATCTTACACCTCAGTCGCTA        |
| Hes1-fw     | CAGACATTCTGGAAATGACTGTGAA       |
| Hes1-rv     | CGCGGTATTTCCCAACAC              |
| Hes5-fw     | GCTCCGCTCGCTAATCGCCTCCAG        |
| Hes5-rv     | GTCCCGACGCATCTTCTCCACCAC        |
| Hey1-fw     | GCCGACGAGACCGAATCAATAACA        |
| Hey1-rv     | TCCCGAAACCCCAAACCTCCGATAG       |
